# Supplementary material
Source: Elsevier journal article supplement (https://researchonline.lshtm.ac.uk/id/eprint/2006445/1/mmc1.pdf)
Supplement: mmc1 [file mmc1.pdf]

# THE LANCET **Neurology**

## **Supplementary webappendix**

This webappendix formed part of the original submission and has been peer reviewed. We post it as supplied by the authors.

Supplement to: Al-Chalabi A, Calvo A, Chio A, et al. Analysis of amyotrophic lateral sclerosis as a multistep process: a population-based modelling study. *Lancet Neurol* 2014; published online Oct 7. [http://dx.doi.org/10.1016/S1474-4422\(14\)70219-4](http://dx.doi.org/10.1016/S1474-4422(14)70219-4).

**Supplementary data**

| <b>Study</b>       | <b>slope estimate</b> | <b>95%CI lower bound</b> | <b>95%CI upper bound</b> |
|--------------------|-----------------------|--------------------------|--------------------------|
| <b>SEALS</b>       | 4.4                   | 3.7                      | 5.1                      |
| <b>Netherlands</b> | 4.9                   | 4.3                      | 5.4                      |
| <b>Piedmont</b>    | 5.1                   | 4.4                      | 5.9                      |
| <b>Ireland</b>     | 5.3                   | 5.0                      | 5.6                      |
| <b>Scotland</b>    | 5.8                   | 5.4                      | 6.2                      |
| <b>Total</b>       | <b>5.1</b>            | <b>4.8</b>               | <b>5.4</b>               |

Supplementary Table 1. Results of the unweighted regression with first and last age groups omitted.

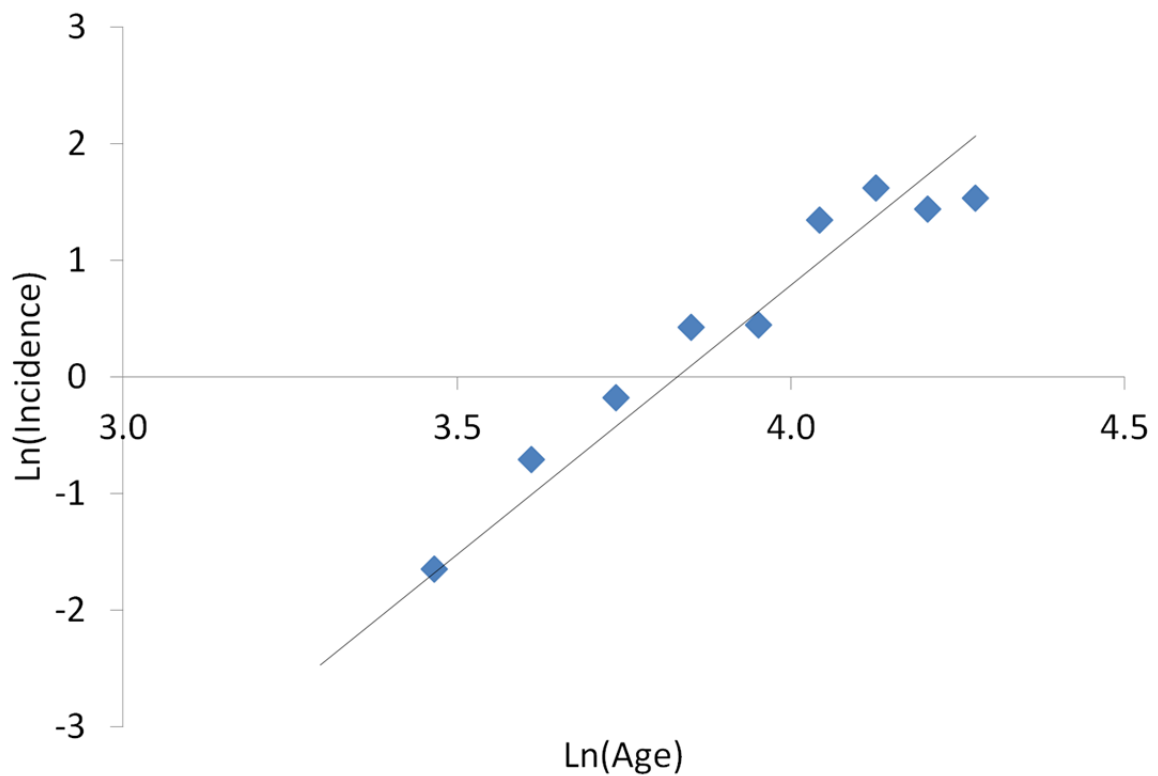

Supplementary Figure 1. The SEALS register graph of Ln(incidence) against Ln(age)

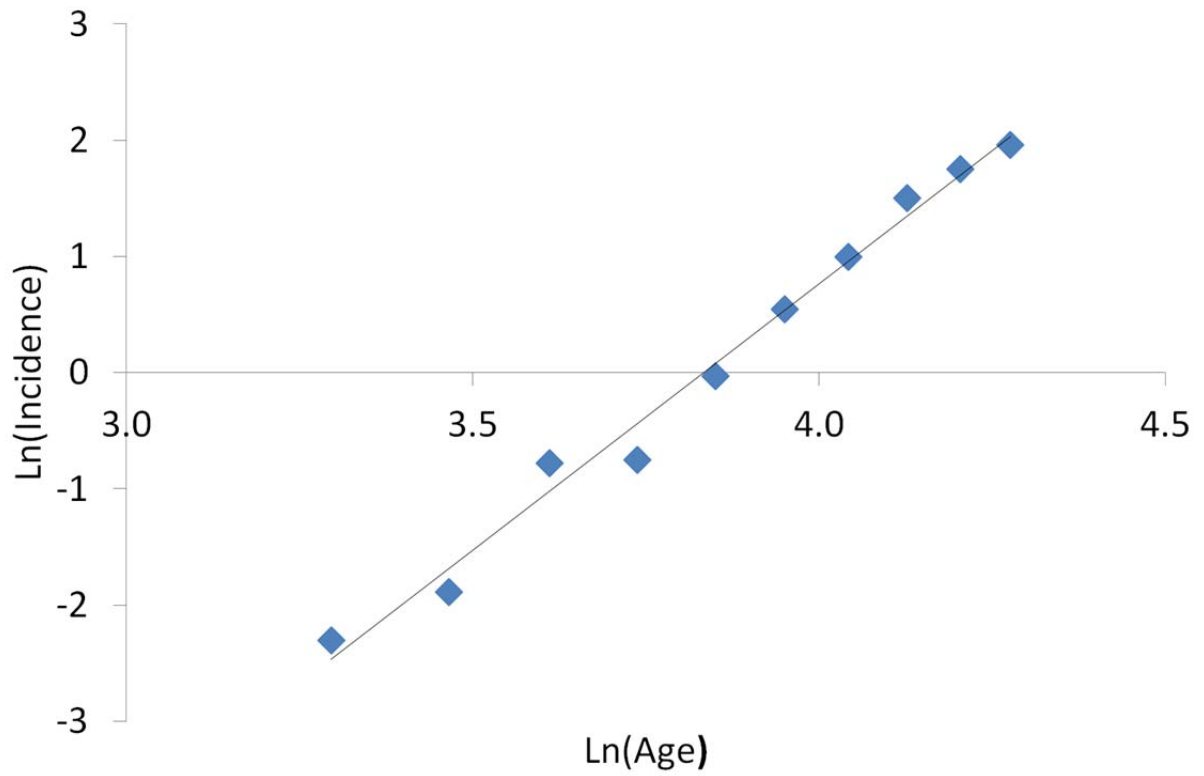

Supplementary Figure 2. The Netherlands register graph of Ln(incidence) against Ln(age)

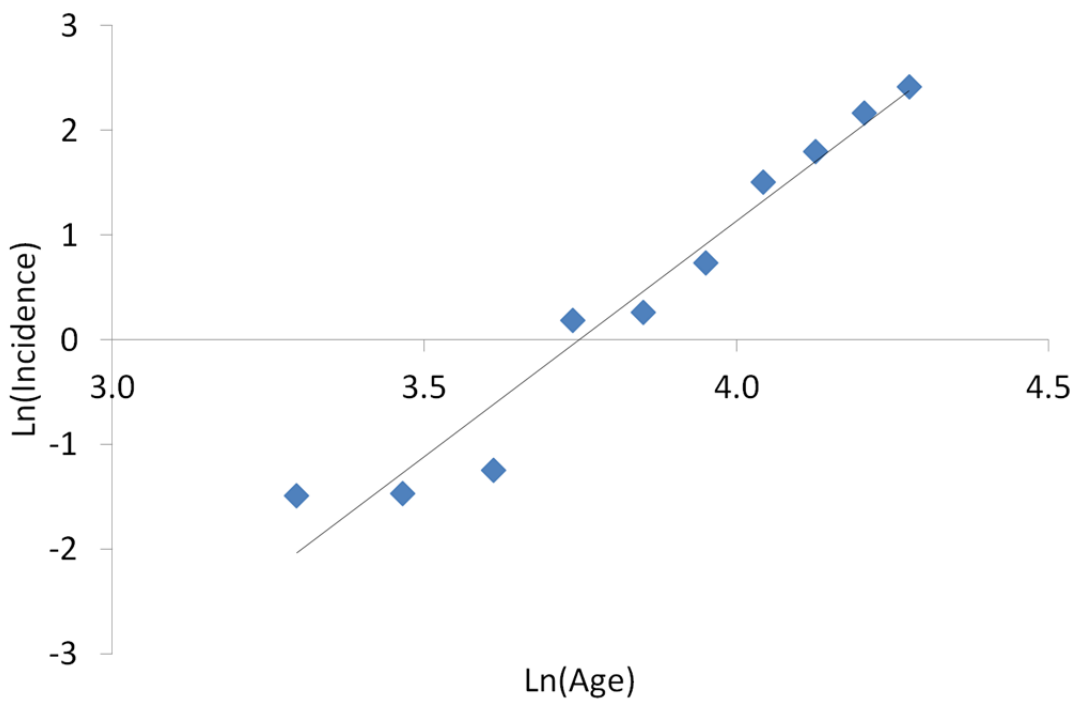

Supplementary Figure 3. The Piedmont register graph of Ln(incidence) against Ln(age)

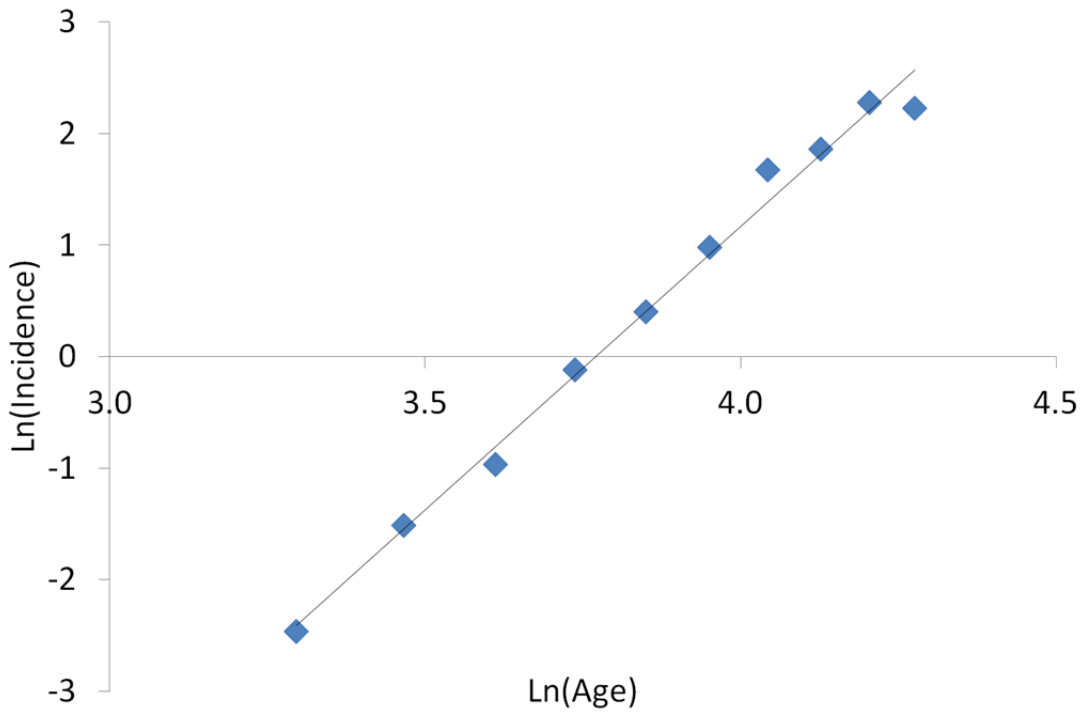

Supplementary Figure 4. The Irish register graph of Ln(incidence) against Ln(age)

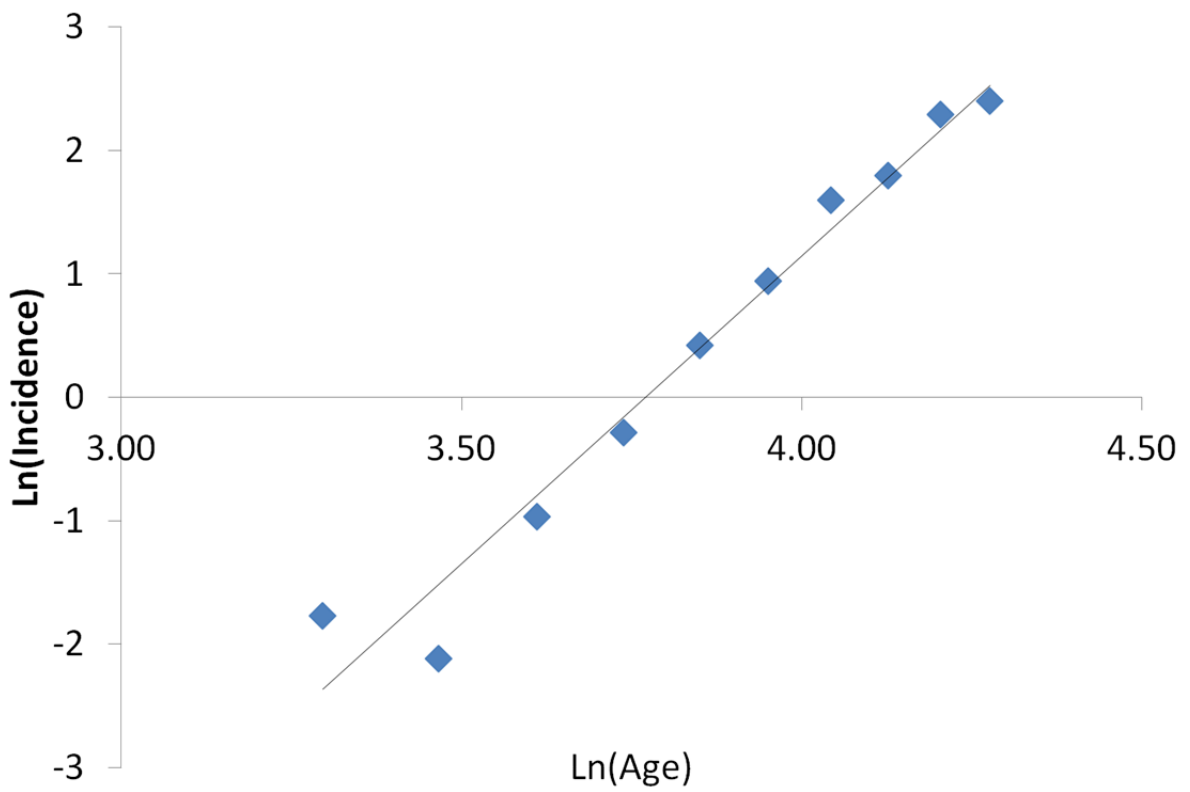

Supplementary Figure 5. The Scottish register graph of Ln(incidence) against Ln(age)
